# Supplementary material for: Sex and Race‐Ethnic Disparities in Door‐to‐CT Time in Acute Ischemic Stroke: The Florida Stroke Registry
Source: PubMed Central journal article supplement — J Am Heart Assoc. 2021 Mar 31;10(7):e017543. doi: 10.1161/JAHA.120.017543 (PMC8174374; doi:10.1161/jaha.120.017543), 2021-03-31
Supplement: JAH3-10-e017543-s001.pdf [file JAH3-10-e017543-s001.pdf]

# **SUPPLEMENTAL MATERIAL**

**Table S1. Factors Associated with Door-to-CT (DTCT) time  $\leq 25$  min.**

| Factors           | DTCT $\leq 25$ vs DTCT $> 25$ |
|-------------------|-------------------------------|
| Age               |                               |
| 65-79 (vs 18-64)  | 1.10 (1.04,1.16)              |
| >80 (vs 18-64)    | 1.03 (0.95,1.11)              |
| NIHSS             |                               |
| 6-15 (vs <5)      | 1.91 (1.71,2.13)              |
| >16 (vs <5)       | 2.13 (1.83,2.48)              |
| Current Smoker    |                               |
| Yes (vs No)       | 1.00 (0.95,1.06)              |
| Hypertension      |                               |
| Yes (vs No)       | 0.98 (0.93,1.03)              |
| Diabetes Mellitus |                               |
| Yes (vs No)       | 0.89 (0.85,0.94)              |
| Dyslipidemia      |                               |
| Yes (vs No)       | 1.01 (0.96,1.06)              |
| Prior CAD/MI      |                               |
| Yes (vs No)       | 0.91 (0.86,0.96)              |
| Prior stroke/TIA  |                               |
| Yes (vs No)       | 0.95 (0.88,1.02)              |
| EMS Arrival       |                               |
| Yes (vs No)       | 2.24 (1.99, 2.52)             |

Fully adjusted model includes age, race/ethnicity, sex, insurance status, smoking status, hypertension, diabetes mellitus, CAD/prior MI, prior stroke /TIA, dyslipidemia, atrial fibrillation, peripheral vascular disease, history of stroke or TIA & ambulation status at admission, NIHSS, arrival mode, and stroke center certification.

**Table S2. Study Cohort Stratified by Sex and Race-Ethnicity.**

|                          | <b>White</b> | <b>Black</b> | <b>Hispanic</b> |
|--------------------------|--------------|--------------|-----------------|
| <b>Male</b>              | 21,684       | 5,439        | 4,671           |
| Door to CT $\leq$ 25 min | 12,470       | 2,878        | 2,722           |
| Door to CT > 25 min      | 9,214        | 2,561        | 1,949           |
| <b>Female</b>            | 21,020       | 5,747        | 4,704           |
| Door to CT $\leq$ 25 min | 11,630       | 2,955        | 2,657           |
| Door to CT > 25 min      | 9,390        | 2,792        | 2,047           |
